# Supplementary material for: Aspirin Is Related to Worse Clinical Outcomes of COVID-19
Source: MDPI journal article supplement (doi:10.3390/medicina57090931), 2021-09-04
Supplement: s1 [file s1]

**Table S1.** Coding for underlying disease.

| Diseases                               | ICD-10 Codes                                                                                         |
|----------------------------------------|------------------------------------------------------------------------------------------------------|
| Hypertension                           | I10, I11, I12, I13, I15 *                                                                            |
| Chronic obstructive pulmonary diseases | J44, J43 (except J43.0) †                                                                            |
| Asthma                                 | J45, J46 ‡                                                                                           |
| Chronic kidney disease                 | N03, N05, N165, N18, N19, N250, I12, I13, Z490, Z491, Z492, Z940, Z992, E102, E112, E132, E142, T861 |
| Diabetes mellitus                      | E10, E11, E12, E13, E14 *                                                                            |
| Cerebrovascular disease                | G45, G46, I60, I61, I62, I63, I64, I65, I66, I67, I68, I69, H340 *                                   |

ICD, International Classification of Disease;

\* Jung, S. Y. , Choi, J. C., You, S. H., Kim, W. Y. Association of Renin-angiotensin-aldosterone System Inhibitors With Coronavirus Disease 2019 (COVID-19)- Related Outcomes in Korea: A Nationwide Population-based Cohort Study. *Clinical Infectious Diseases* 2020;71(16):2121–8. doi: 10.1093/cid/ciaa624

† Lee, S.C., Son, K. J., Han, C. H., Park S. C., Jung, J. Y. Impact of COPD on COVID-19 prognosis: A nationwide population-based study in South Korea. *Scientific Reports* 11, 3735 (2021). doi.org/10.1038/s41598-021-83226-9

‡ Woo, A., Lee, S. W., Koh, H. Y., Kim, M. A., Han, M. Y., & Yon, D. K. (2020). Incidence of cancer after asthma development: two independent population-based cohort studies. *Journal of Allergy and Clinical Immunology*. doi:10.1016/j.jaci.2020.04.041

|| Kang, S. H., Kim, S. W., Kim, Y., Cho, K. H., Park, J. W., Do, J. Y. Association between Chronic Kidney Disease or Acute Kidney Injury and Clinical Outcomes in COVID-19 Patients. *J Korean Med Sci.* 28;35(50). doi.org/10.3346/jkms.2020.35.e434
